# Supplementary material for: Stakeholders’ views on volunteering in mental health: an international focus group study
Source: HighWire-hosted journal article supplement (doi:10.1136/bmjopen-2021-052185), 2022-03-01
Supplement: bmjopen-2021-052185supp001_data_supplement.pdf [file bmjopen-2021-052185supp001_data_supplement.pdf]

| <b>Theme 1. 'There is a framework in which volunteering is organised'</b>                                                                                                                                                                                                                                                                                                                                                                                                                                                                                                                                                              |
|----------------------------------------------------------------------------------------------------------------------------------------------------------------------------------------------------------------------------------------------------------------------------------------------------------------------------------------------------------------------------------------------------------------------------------------------------------------------------------------------------------------------------------------------------------------------------------------------------------------------------------------|
| <b>1.1. Volunteers' motivations are key/ Volunteers can also be keen to gain something/ Volunteers may wish to help</b>                                                                                                                                                                                                                                                                                                                                                                                                                                                                                                                |
| <i>"I think for volunteers there needs to be quite a lot of support and thinking about people's rationale as to why they volunteer – 'cos I know that I did it because it's great to be around children and you've gotta make sure that when you're volunteering you're not bringing too much of your own agenda into situations."</i><br>(London Mental Health Professionals Focus Group 1, Participant 4, Social worker)                                                                                                                                                                                                             |
| <i>"Quando uma pessoa diz assim 'fazer voluntariado e não esperar nada em troca', é um bocado mentira, porque uma pessoa acaba sempre por ter alguma coisa em troca, não é? Nem que não seja sentir-se bem, pronto ... 'eu ajudei esta pessoa e sinto-me bem, por isso ... já ganhei'."</i><br>(Porto Volunteers Focus Group 1, Participant 1)                                                                                                                                                                                                                                                                                         |
| <i>"Bénévole ça arrive avec la question de l'initiative, c'est quand même le désir qui est quelques choses qu'on a envie de pouvoir réveiller dans les gens qui vont mal."</i><br>(Brussels Mental Health Focus Group 3, Participant 10, Psychiatrist in training)                                                                                                                                                                                                                                                                                                                                                                     |
| <b>1.2. Volunteers should be selected and assessed/ Volunteers selected, but based on which criteria/ Volunteers may be unsuitable</b>                                                                                                                                                                                                                                                                                                                                                                                                                                                                                                 |
| <i>"There should be some sort of...a selection criteria or assessment because obviously we are looking after human beings who are very, very vulnerable."</i> (London Mental Health Professionals Focus Group 2, Participant 10, Nurse)                                                                                                                                                                                                                                                                                                                                                                                                |
| <i>"Depende da seleção que se faz dos voluntários, não é? ... Se é uma entrada, no fundo, livre para toda a gente, pessoas que não tenham a mínima formação e até capacidades intelectuais para entender e capacidades emocionais...É completamente diferente de, se calhar, selecionar... tinha que se definir critérios, é muito complicado..."</i> (Porto Mental Health Professionals Focus Group 4, Participant 16, Psychiatrist in training)                                                                                                                                                                                      |
| <i>"J'ai déjà refusé une personne comme ça parce que je sentais que la fragilité était vraiment trop grande, pas qu'elle n'était pas capable de le faire."</i> (Brussels Mental Health Professionals Focus Group 4, Participant 21, Psychologist)                                                                                                                                                                                                                                                                                                                                                                                      |
| <b>1.3. All kinds of people can be a volunteer/ It is a paradox to select volunteers/ There is a priori selection</b>                                                                                                                                                                                                                                                                                                                                                                                                                                                                                                                  |
| <i>"It could be anybody, it could be someone who's like a retired bank manager or ... who's got some time on their hands, who wishes to volunteer... they could be coming from any background and bringing all that different aspect of the world really."</i> (London Mental Health Professionals Focus Group 2, Participant 6, Social Worker)                                                                                                                                                                                                                                                                                        |
| <i>"O panorama ideal já sei que é utópico e que nunca existe, mas ... seria precisamente que os voluntários só por si por definição já por serem voluntários, porque no fundo há uma seleção natural. A priori. Quer dizer, selecionar voluntários, avaliar voluntários e recrutar voluntários, isto por si já é um contrassenso."</i> (Porto Mental Health Professionals Focus Group 2, Participant 8, Psychologist)                                                                                                                                                                                                                  |
| <i>"Il y a quand même une sélection naturelle, tout le monde n'a pas les mêmes compétences, et c'est heureux, et on n'a pas les mêmes tout le temps, et c'est pas grave, on sait s'organiser."</i> (Brussels Volunteers Focus Group 1, Participant 4)                                                                                                                                                                                                                                                                                                                                                                                  |
| <b>1.4. Organisations are responsible for volunteers/ A check-up should be done on volunteers/ Must be a triangular relationship</b>                                                                                                                                                                                                                                                                                                                                                                                                                                                                                                   |
| <i>"Sending out people that volunteered only then to befriend someone with mental illness – they have responsibility to safeguard that person – basic knowledge, basic training about mental illness in general."</i> (London Mental Health Professionals Focus Group 2, Participant 5, Nurse)                                                                                                                                                                                                                                                                                                                                         |
| <i>"Também acho que não vão selecionar [com] uma doença... uma coisa ativa, não é, uma hepatite B ativa em que até o próprio suor se pode pegar, e num abraço poderia haver esse problema."</i> (Porto Mental Health Professionals Focus Group 1, Participant 4, Psychiatrist in training)                                                                                                                                                                                                                                                                                                                                             |
| <i>"Tout faire pour éviter effectivement le lien de un à un. Parce que je pense que ça il y a vraiment du risque, pour tout le monde d'ailleurs, et c'est un peu une formule de toute la limite que ça mais l'idée que l'on a qui se soutient c'est bien évidemment c'est un lien entre deux individus mais que ce type de lien ne peut être fécond que si ça se passe toujours à trois. Le trois étant symbolique, mais étant notamment la présence d'une institution."</i> (Brussels Mental Health Professionals Focus Group 1, Participant 3, Social Worker)                                                                        |
| <b>1.5. To train or not to train/ Training may or may not be important, depending on how much/ Advantages and disadvantages of training</b>                                                                                                                                                                                                                                                                                                                                                                                                                                                                                            |
| <i>"It's important to give some training for some risk assessment. But then, where do we get the balance, not to make it too formal. Um, with my little experience when people get formal training so when they see a patient behaviour and this, 'Oh this is a personality disorder, this is bipolar, this is...' it's like giving them a diagnosis from the little training they've had. So yeah, it's important to give them training, in terms of risk assessment, but it's also equally useful to have that layman's perspective of things as well."</i> (London Mental Health Professionals Focus Group 2, Participant 7, Nurse) |
| <i>"Acho que alguma formação de determinados campos era importante, a saúde mental acho que, que não podemos ir assim só, de coração, também, é bom, mas convém ter alguma formação, daquelas específicas."</i> (Porto Volunteers Focus Group 2, Participant 5)                                                                                                                                                                                                                                                                                                                                                                        |
| <i>"Acho que poderia haver o risco se calhar se em alguns aspetos não se entendesse bem algumas coisas da formação, se não se entendesse bem...por exemplo, alguma patologia. E aí a pessoa fica com uma ideia errada dessa patologia. E pode, se calhar, estar a, a reagir com uma pessoa que, à partida, não necessitaria de, de um trato diferente, e estar a ter esse trato diferente porque confundiu se, se houver confusões na formação...podia ser pior."</i> (Porto Volunteers Focus Group 1, Participant 1)                                                                                                                  |

*"D'abord si je décide moi d'être bénévole dans deux semaines dans le domaine de la santé mentale, j'ai besoin d'apprendre certaines choses."* (Brussels Volunteers Focus Group 2, Participant 8)

*"Ou est ce que justement il faut éviter de médicalisée les volontaires que c'est bien d'avoir des personnes qui vont rencontrer ces personnes là sans avoir toutes toutes ces choses en tête."* (Brussels Volunteers Focus Group 2, Participant 7)

#### **1.6. Matching and the right to be re-matched/ Matching on their characteristics/ Appropriate matching**

*"I had a right to choose whether or not I want to work with her. Because I have my own...I'm a human-being, I have my own issues as well. So that might trigger certain things for me."* (London Volunteers Focus Group 1, Participant 5)

*"Eu acho que tem que haver um match entre o voluntário e o doente mental. Acho que, se calhar, há doentes que vão beneficiar de um voluntário mais assertivo e que saiba dizer não e ... que o ajude a cumprir regras. Se calhar, há outros doentes que precisam de uma pessoa, se calhar, mais carinhosa, mais... calma, mais tranquila, que lhes dê um bocadinho mais de espaço. Portanto, eu acho que, além de ter formação sobre as patologias, se calhar era bom ter um encaixe nos perfis..."* (Porto Mental Health Professionals Focus Group 3, Participant 9, Psychiatrist in training)

*"Il faudrait peut-être alors à ce moment là que des personnes du service hospitalier dirigent le bénévole vers certains patients qui ne sont pas des cas un peu plus lourd et donc qui demande une forme d'attention plus particulière et nécessitant peut-être plus de connaissances."* (Brussels Volunteers Focus Group 1, Participant 3)

#### **1.7. The strong volunteering culture in the UK/ Volunteering with rules and a structure/ Organisational framework with specific values**

*"But I think in the UK there is a culture of volunteering, like it's quite strong – people rely on that quite a lot so I think it's just something that is a bit more there."* (London Mental Health Professionals Focus Group 4, Participant 14, Psychiatrist)

*"Tem que haver realmente uma estrutura por trás para fazer realmente essa formação, essa seleção."* (Porto Mental Health Professionals Focus Group 2, Participant 5, Occupational Therapist)

*"Moi je dirais plutôt qu'il doit être un soutien pour le patient. Qu'importe le service, qui se soit le service social, le service de santé ou le service quel qui soit. Maintenant il y a sans doute une différence entre le travail à l'intérieur de l'hôpital et celui à domicile ou chez l'autre. Je pense que le pair-aidant ou le benevol doit toujours rester dans un cadre précis. On peut changer de casquettes en casquettes, on peut se trouver dans le service social et dans le service medical a la fois, mais on doit toujours être dans un cadre précis."* (Brussels Volunteers Focus Group 1, Participant 3)

| <b>Theme 2. The role of the volunteer is multifaceted</b>                                                                                                                                                                                                                                                                                                                                                                                                                                                                                               |
|---------------------------------------------------------------------------------------------------------------------------------------------------------------------------------------------------------------------------------------------------------------------------------------------------------------------------------------------------------------------------------------------------------------------------------------------------------------------------------------------------------------------------------------------------------|
| <b>2.1. Be with/ Provide company and support the patient/ Accompany patients</b>                                                                                                                                                                                                                                                                                                                                                                                                                                                                        |
| <i>"You have to be there for that person, you have to be there to have that chat, sit beside the person."</i> (London Mental Health Professionals Focus Group 2, Participant 5, Nurse)                                                                                                                                                                                                                                                                                                                                                                  |
| <i>"Penso que é mais a companhia e muitas vezes essas pessoas não se apercebem das situações em que estão, ou se apercebem pode-se sentir sozinhos e diferentes dos outros, e acho que fazer companhia a essas pessoas também as ajuda a sentirem-se melhores."</i> (Porto Volunteers Focus Group 1, Participant 4)                                                                                                                                                                                                                                     |
| <i>"Si c'est juste faire un tour dans un parc, aller chercher une cigarette, faire une ou deux courses, c'est vraiment pouvoir accompagner pour que le patient ne soit pas livré à lui-même, par rapport à la société."</i> (Brussels Mental Health Professionals Focus Group 4, Participant 19, Nurse)                                                                                                                                                                                                                                                 |
| <b>2.2. Give hope to/ Support patients to rediscover life/ Give hope and return to who they were before the illness</b>                                                                                                                                                                                                                                                                                                                                                                                                                                 |
| <i>"We need also someone to talk to, to give them some hope, to instil some hope in them."</i> (London Mental Health Professionals Focus Group 2, Participant 7, Nurse)                                                                                                                                                                                                                                                                                                                                                                                 |
| <i>"Nós vemos muitas pessoas, na nossa prática diária, que perderam o sentido da vida, que ficaram reformados, e que não têm objetivo nenhum... e isso nós olhamos e pensamos, esta pessoa sempre viveu, em função de alguém, eram os filhos, era marido, que estava acamado e depois morreu, e precisamente lembro-me desta história, de alguém, que depois deprime porque já não tem um incentivo... E eu encontro n pessoas que só iriam beneficiar."</i> (Porto Mental Health Professionals Focus Group 1, Participant 2, Psychiatrist in Training) |
| <i>"Quand c'est ponctuel avec un peu de chance nous donnons l'espoir. C'est très important l'espoir, spécialement pour la santé mentale après la personne peut rentrer grâce à cet espoir dans un programme plus long ou elle va être aidée d'autres professionnels et d'autres bénévoles par exemple."</i> (Brussels Volunteers Focus Group 2, Participant 8, Volunteer)                                                                                                                                                                               |
| <b>2.3. Not to judge patients/ A transition figure/ Not labelling patients</b>                                                                                                                                                                                                                                                                                                                                                                                                                                                                          |
| <i>"With the volunteer there's this less stigma attached and they feel less judged by someone who they could probably just be friends with."</i> (London Mental Health Professionals Focus Group 3, Participant 12, Psychologist)                                                                                                                                                                                                                                                                                                                       |
| <i>"Se o voluntário interpretasse o seu papel como uma figura de transição, e se ele tivesse um objetivo de criar outras relações para o doente, ele podia sair do cenário, quando visse que já não era necessário e que o doente por ele próprio já é capaz de criar relações..."</i> (Porto Mental Health Professionals Focus Group 1, Participant 2, Psychiatrist in training)                                                                                                                                                                       |
| <i>"Ce qui est très chouette c'est qu'ils ne diagnostiquent pas, donc ils ne sont pas comme nous...comme moi le psychotique. Et c'est parfois étonnant, parce qu'ils travaillent quelque part avec la partie saine de la personne forcément. Donc ça c'est quelque chose que peut être..."</i> (Brussels Mental Health Professionals Focus Group 3, Participant 12, Psychologist)                                                                                                                                                                       |
| <b>2.4. Address patients' needs/ To keep an eye on the patient/ Respond to a need and offer what services do not</b>                                                                                                                                                                                                                                                                                                                                                                                                                                    |
| <i>"Look at their kind of individual needs and what makes them kind of them and unique as opposed to things always being focused around their diagnosis and what happens there."</i> (London Mental Health Professionals Focus Group 1, Participant 4, Social Worker)                                                                                                                                                                                                                                                                                   |
| <i>"A vigilância ia acabar por ser uma consequência da companhia. Enquanto aquele doente sentir que está acompanhado pode protegê-lo."</i> (Porto Mental Health Professionals Focus Group 2, Participant 8, Psychologist)                                                                                                                                                                                                                                                                                                                               |
| <i>"Je trouve ça répond à un besoin, on le voit d'ailleurs. Il expliquait que les patients psychiatriques souvent deviennent des fidèles. Ce qu'il y a clairement un besoins que le système n'offre pas."</i> (Brussels Mental Health Professionals Focus Group 1, Participant 3, Nurse)                                                                                                                                                                                                                                                                |
| <b>2.5. Do social activities with</b>                                                                                                                                                                                                                                                                                                                                                                                                                                                                                                                   |
| <i>"And you spend time with that person doing something. You have a cup of tea or you laugh together or you watch a movie and you share experiences."</i> (London Mental Health Professionals Focus Group 3, Participant 10, Psychiatrist)                                                                                                                                                                                                                                                                                                              |
| <i>"A partir do momento em que um doente mental tem este amigo, este amigo vai levá-lo para atividades lúdicas, para atividades de lazer. Ou seja, vai abrir outras portas de socialização. Por exemplo, o amigo leva-o ao futebol e no futebol vai acabar por, naturalmente, aos poucos ir criando novos contactos e abrir novas janelas de socialização. As coisas começam a correr sozinhas."</i> (Porto Mental Health Professionals Focus Group 4, Participant 13, Psychiatrist in training)                                                        |
| <i>"Créer cette relation d'aide plutôt à l'extérieur autour d'une tasse de café, "eh bien tiens voilà", après c'est déjà juste faire sortir la personne c'est déjà assez énorme. Donc c'est vrai qu'avant de faire cela il faut donc déjà créer un minimum de relation avant parce que ce n'est pas parce qu'on arrive et qu'on dit : "allez on va boire un café !" ça ne marche pas."</i> (Brussels Mental Health Professionals Focus Group 4, Participant 2, Occupational Therapist)                                                                  |
| <b>2.6. Practice social skills/ Provide competencies/ Helping patients</b>                                                                                                                                                                                                                                                                                                                                                                                                                                                                              |
| <i>"I think it's important to take the meds but I think it's important to have people to talk to and to be sociable and not to lose those skills."</i> (London Mental Health Professionals Focus Group 2, Participant 6, Social Worker)                                                                                                                                                                                                                                                                                                                 |
| <i>"Será que não é necessário, não é melhor dar ou procurar dar aos doentes, as ferramentas para que possam eles próprios criarem relações de amizade, ou buscarem-nas?"</i> (Porto Mental Health Professionals Focus Group 1, Participant 3, Psychiatrist in training)                                                                                                                                                                                                                                                                                 |

|                                                                                                                                                                                                                                                                                                                                                                                                                                                                                                     |
|-----------------------------------------------------------------------------------------------------------------------------------------------------------------------------------------------------------------------------------------------------------------------------------------------------------------------------------------------------------------------------------------------------------------------------------------------------------------------------------------------------|
| <p><i>"Mais quand il y a aide directe à la personne il y a d'abord cet objectif là qui est d'aider et de soutenir la personne. Et d'un point de vue plus personnel pour le bénévole, il y a une question d'occupation d'abord."</i> (Brussels Volunteers Focus Group 1, Participant 1)</p>                                                                                                                                                                                                          |
| <p><b>2.7. Share experiences/ Provide new experiences/ Relational exchanges</b></p>                                                                                                                                                                                                                                                                                                                                                                                                                 |
| <p><i>"They could talk for a whole hour and I would just sit there nodding and listening, 'cos that's a therapeutic thing for them, but this is a visit between a layman – myself – completely amateur guy and an old lady, who just happens to be a bit, you know... has problems, mentally ill, but to me it's a visit; we talk about things...it's not a therapy session.</i> (London Volunteers Focus Group 1, Participant 1)</p>                                                               |
| <p><i>"Eu acho que são pessoas que, fruto da sua doença mental estão privadas de muitas experiências... e não acho que seja forçosamente mau, dar-lhe uma experiência que eles nunca mais vão... voltar a ter..."</i> (Porto Mental Health Professionals Focus Group 1, Participant 1, Psychiatrist in training)</p>                                                                                                                                                                                |
| <p><i>"À chaque fois une rencontre, un partage, une rencontre particulière sur un mode particulier, mais c'est vrai qu'être en lien, rencontrer vraiment une personne là où elle est avec ses difficultés, ça apporte à ça aussi à part le partage et la relation qui peut se nouer et les échanges relationnelles."</i> (Brussels Mental Health Professionals Focus Group 2, Participant 13, Psychiatrist in training)</p>                                                                         |
| <p><b>2.8. Give patients realistic feedback/ Educate the patients/ Instil ideas into the patients</b></p>                                                                                                                                                                                                                                                                                                                                                                                           |
| <p><i>"It would be useful to have a ... [volunteer] who is able to give some realistic feedback... If you just have someone who is like completely accepting in a way that other people, in the general population aren't you're not actually getting any realistic feedback."</i> (London Mental Health Professionals Focus Group 1, Participant 3, Occupational Therapist)</p>                                                                                                                    |
| <p><i>"O nosso principal papel acaba por ser um bocadinho educacional, tentar ensinar, e se calhar mais do que uma vez, porque o facto é que nós por vezes deparamo-nos com pessoas que não entendem à primeira, não entendem à segunda, ou não entendem à terceira, e nós temos que ter a capacidade para saber dar a volta à situação, para perceber as limitações da pessoa, de forma a ajudá-la a ter algum cuidado extra para consigo."</i>(Porto Volunteers Focus Group 2, Participant 5)</p> |
| <p><i>"Donc il y a souvent cette volonté d'apporter quelque chose à la personne et de vouloir injecter dans la dynamique de la personne des idées ou des choses qui vont lui permettre d'aller mieux par rapport à sa souffrance."</i> (Brussels Mental Health Professionals Focus Group 3, Participant 13, Psychiatrist in training)</p>                                                                                                                                                           |
| <p><b>2.9. Collaborate with services/ To complement, liaise or be part of services/ Collaborate with or be part of services</b></p>                                                                                                                                                                                                                                                                                                                                                                 |
| <p><i>"There has to be some sort of link if you like – I don't know but I'm hoping – between the volunteering agency and if you like mental health services or their identified care coordinators as the case may be, who can then...if there is need, liaise with the volunteering agency to kind of have some sort of update on how the service user is doing or getting along with the person volunteering."</i> (London Mental Health Professionals Focus Group 2, Participant 5, Nurse)</p>    |
| <p><i>"Podemos também ter uma pessoa que possa sinalizar, por exemplo, quando há algum problema. Até sinalizar aos profissionais se houver algum sinal de descompensação. Haver algum elo que possa promover que os serviços de saúde saibam sempre que aconteça alguma coisa com o doente. Não funcionando como serviço de saúde, mas como este elo de ligação."</i> (Porto Mental Health Professionals Focus Group 4, Participant 14, Psychiatrist in training)</p>                               |
| <p><i>"C'est pour ça que le cadre est important en ce que je pense dans le bénévolat, dans certains cas, le bénévole peut être à la fois partenaire de l'équipe de soins, donc ils peuvent travailler avec les autres professionnels."</i> (Brussels Mental Health Professionals Focus Group 1, Participant 3, Social Worker)</p>                                                                                                                                                                   |

| <b>Theme 3. Every relationship has a different character</b>                                                                                                                                                                                                                                                                                                                                        |
|-----------------------------------------------------------------------------------------------------------------------------------------------------------------------------------------------------------------------------------------------------------------------------------------------------------------------------------------------------------------------------------------------------|
| <b>3.1. A contracted friendship/ A friendship by decree/ To be a friend or not</b>                                                                                                                                                                                                                                                                                                                  |
| <i>"So it's like, it's a contracted friendship . I'm here to kind of, to have a social relationship with you – but it's contracted almost, so it's not a natural-forming relationship."</i> (London Mental Health Professionals Focus Group 1, Participant 2, Nurse)                                                                                                                                |
| <i>"É uma pessoa que surge agora na vida do doente por uma decisão de cima para baixo, por decreto, não é? Há bocadinho falaste na referenciação do doente a um voluntário, a dizer assim 'olha agora vais acompanhar este doente' portanto é por decreto, é uma relação que se estabelece artificialmente."</i> (Porto Mental Health Professionals Focus Group 2, Participant 8, Psychologist)     |
| <i>"Mais si le bénévolat se décline sous d'autre forme, comme un accompagnement réel ou quoi, y a aussi cette distance peut-être physique qui n'existe pas et qui pourrait aussi poser question et comment remettre ce cadre-là, comment dire que je suis là pour t'accompagner mais je ne suis pas ton ami."</i> (Brussels Mental Health Professionals Focus Group 1, Participant 1, Psychologist) |
| <b>3.2. A mentorship/ A helping relationship/ A bond</b>                                                                                                                                                                                                                                                                                                                                            |
| <i>"A kind of...sort of mentorship aspect. So I suppose where the other person is... in a way role-modelling, has something maybe to offer that the other person doesn't have experience of, or kind of some advice or guidance aspect. Without obviously being a professional situation."</i> (London Mental Health Professionals Focus Group 1, Participant 3, Occupational Therapist)            |
| <i>"Vai ser uma relação assimétrica. Mesmo na amizade. Há sempre um que foi visto como aquele que tem patologia mental e o outro que não tem patologia mental. E um está para ajudar... É uma relação de ajuda."</i> (Porto Mental Health Professionals Focus Group 3, Participant 12, Psychiatrist in training)                                                                                    |
| <i>"Et en même temps, il est content le bénévole aussi parce que ça c'est un bon moment qu'on passe avec une personne, meme se elle n'est pas bien, la voir sourire c'est important si on y arrive jusqu'à être là il y a peu de chaleur humaine et ça je pense que oui."</i> (Brussels Volunteers Focus Group 2, Participant 8)                                                                    |
| <b>3.3. It is reciprocal/ A reciprocal exchange/ A reciprocal relationship</b>                                                                                                                                                                                                                                                                                                                      |
| <i>"The relationship is a reciprocal relationship, so we do have to take both sides into."</i> (London Mental Health Professionals Focus Group 3, Participant 12, Psychologist)                                                                                                                                                                                                                     |
| <i>"A gente como vocês que vai ajudar uma pessoa idosa que vai fazer voluntariado, também essas pessoas idosas também transmitem coisas antigas, vão aprender e eles vão aprender reciprocamente também ficam mais ricos de parte a parte."</i> (Porto Volunteers Focus Group 1, Participant 3)                                                                                                     |
| <i>"Une relation avec une autre personne et de cette relation nait aussi pour moi un partage qui est très riche, donc c'est contribuer c'est donner de l'aide, le benevolat pour moi c'est recevoir beaucoup, le bénévolat c'est souvent des cadeaux en faite, nous recevons de l'autre."</i> (Brussels Volunteers Focus Group 2, Participant 8)                                                    |
| <b>3.4. It is patient-centred/ In limbo between a friend and a professional/ A relationship between two people</b>                                                                                                                                                                                                                                                                                  |
| <i>"Like person-centred. So it depends on who you're supporting and what their needs may be."</i> (London Volunteers Focus Group 1, Participant 3)                                                                                                                                                                                                                                                  |
| <i>"Estamos a ver o voluntário na perspetiva, de que é uma espécie de um intermédio entre amigo e técnico... portanto nem é técnico, nem é amigo... está ali num limbo."</i> (Porto Mental Health Professionals Focus Group 1, Participant 3, Psychiatrist in training)                                                                                                                             |
| <i>"C'est pas la même chose d'être en lien avec Mr [A] que avec le Dr [B], je pense qu'en terme de représentation ça fait une grande différence, et en même temps l'enjeu c'est que, nous on est assez intangible a l'affaire, c'est de dire, mais oui ce sont deux personnes."</i> (Brussels Mental Health Professionals Focus Group 1, Participant 3, Social Worker)                              |
| <b>3.5. Not one size fits all/ A relationship hard to predict / The volunteer occupies a larger space in patients' lives</b>                                                                                                                                                                                                                                                                        |
| <i>"Look at their kind of individual needs and what makes them kind of them and unique as opposed to things always being focused around their diagnosis."</i> (London Mental Health Professionals Focus Group 1, Participant 4, Social Worker)                                                                                                                                                      |
| <i>"Criar uma amizade não é uma coisa matemática que se possa prever à partida."</i> (Porto Mental Health Professionals Focus Group 4, Participant 15, Psychiatrist in training)                                                                                                                                                                                                                    |
| <i>"L'expérience ce que moi j'ai, de ce que les patients racontent ce que à partir du moment la place relative ce que le bénévole tiens dans la vie du patient est disproportionnée par rapport à la place que le patient tiens dans la vie du bénévole."</i> (Brussels Mental Health Professionals Focus Group 2, Participant 9, Psychiatrist)                                                     |
| <b>3.6. It is time-limited/ It may or may not have a maximum time/ A finite relationship</b>                                                                                                                                                                                                                                                                                                        |
| <i>"Some of them just came off a bit sooner than they expected. So we just sort of set them up and they were getting used to working alongside the team and running some groups and then they'd suddenly be gone again. And that was always a bit disappointing really – not just for us but for patients."</i> (London Mental Health Professionals Focus Group 4, Participant 13, Psychiatrist)    |
| <i>"O máximo ... não faz sentido, porque a ideia de uma amizade é, precisamente, prolongar-se no tempo e não ter um fim destinado."</i> (Porto Mental Health Professionals Focus Group 4, Participant 14, Psychiatrist)                                                                                                                                                                             |
| <i>"Et s'il y avait un critère en dehors de ses éléments là à demander à des bénévoles c'est la durée. C'est la durée de l'engagement je trouve, beaucoup plus que des qualités intrinsèques."</i> (Brussels Mental Health Professionals Focus Group 2, Participant 9, Psychiatrist)                                                                                                                |

**3.7. Explicit boundaries/ It is a contract/ The relationship exists because of the mental illness**

*"We're saying it's a bounded relationship, but actually ...any relationships have boundaries but they're not often explicit ...which actually is something that some of our...some people we work with struggle with. So it's just about the explicitness of boundaries isn't it? and the extent. So they are there in all relationships, even in our, in friendships."* (London Mental Health Professionals Focus Group 1, Participant 3, Occupational Therapist)

*"Um contrato, pronto... Um compromisso que o voluntário tem sob a alçada desta coisa chamada voluntariado, que tem um conjunto de regras e que é durante aquele tempo, porque durante aquele tempo... As pessoas, depois até podem continuar a relação e continuar a amizade mas aí, se calhar, já não faz sentido sob a alçada destas regras."* (Porto Mental Health Professionals Focus Group 4, Participant 13, Psychiatrist)

*"Donc la difficulté c'est donc de trouver l'objet qui va faire la rencontre. Parce que si c'est l'objet qui fait la rencontre, c'est la maladie mentale, soit-on est malade mentale, soit-on est proches d'un malade mentale."* (Brussels Mental Health Professionals Focus Group 2, Participant 9, Psychiatrist)

**3.8. Fluid boundaries/ Became a friendship/ With distance or proximity**

*"The boundaries are always fluid... I mean they change according to the individual we are working with and I've worked like with elderly people in the past as well where I knew they were gonna say "Are you married dear?" and it's fine to say "yes or no I am" because you know you might not see them again;...it's just a very normal social question, but if someone... asks me that in my work I would...rarely."* (London Mental Health Professionals Focus Group 1, Participant 3, Occupational Therapist)

*"Tenho amigos que eram sem abrigo que, dormiam na rua mesmo, quando se tornaram meus amigos, 5 anos, e são meus amigos ainda, e que eu acompanhei em [voluntariado]."* (Porto Volunteers Focus Group 2, Participant 5)

*"Il y a un grand nombre de gens qui n'arrivent pas à mettre la distance, et qu'il y a un grand nombre des gens qui n'arrivent pas à mettre de la proximité."* (Brussels Mental Health Professionals Focus Group 1, Participant 3, Social Worker)

**3.9. May be compelled to break boundaries/ The trust is broken if the confidentiality is breached/ There is a randomness for the relationship to work**

*"How you find yourself in very tricky situations. You can end up lending people money because they don't have money for food, or you know sort of like, you are easily drawn to break boundaries or to break confidentiality."* (London Mental Health Professionals Focus Group 3, Participant 10, Psychiatrist)

*"Depois há o problema, pode nem ser tanto da confidencialidade, mas pode ser da confiança, isto é um voluntário que um dia saíba alguma informação que a vá transmitir ou à família ou ao médico pode perder completamente a confiança do doente e lá vai o trabalho todo por água abaixo."* (Porto Mental Health Professionals Focus Group 2, Participant 7, Nurse)

*"Donc il y a parfois des proximités, il y a parfois il y a des amitiés, enfin il y a quelque chose, je parlais tout à leur de la dimension spirituelle."* (Brussels Mental Health Professionals Focus Group 2, Participant 9, Psychiatrist)

| <b>Theme 4. To volunteer is to face challenges</b>                                                                                                                                                                                                                                                                                                                                                                                                                                                                                                                                                                                                                                                                                                                                                                                                                                                                                                                                                          |
|-------------------------------------------------------------------------------------------------------------------------------------------------------------------------------------------------------------------------------------------------------------------------------------------------------------------------------------------------------------------------------------------------------------------------------------------------------------------------------------------------------------------------------------------------------------------------------------------------------------------------------------------------------------------------------------------------------------------------------------------------------------------------------------------------------------------------------------------------------------------------------------------------------------------------------------------------------------------------------------------------------------|
| <b>4.1. Stigma is a big issue / Lack of education and stigma of mental illness/ Mental health stigma</b>                                                                                                                                                                                                                                                                                                                                                                                                                                                                                                                                                                                                                                                                                                                                                                                                                                                                                                    |
| <i>"I think the big campaigns...the big media hype that we see around mental health is always so very negative. So I think, you know I think that stigma is really a big issue."</i> (London Mental Health Professionals Focus Group 1, Participant 2, Nurse)                                                                                                                                                                                                                                                                                                                                                                                                                                                                                                                                                                                                                                                                                                                                               |
| <i>"Eu acho que passa também muito pela sociedade em geral, não só... pelos responsáveis que estarão neste caso acima das instituições responsáveis, mas pela própria educação, para a saúde mental, que é uma coisa que não existe ou escasseia no nosso país, nós começamos a ver a educação para o cancro do pulmão, e a educação para o cancro, papilomas, etc., maço de tabaco coloridos com imagens de cancros ... começa-se a fazer algum trabalho nesse sentido, na área da saúde mental não se vê nada, e o estigma existe mas está no seio da sociedade, não está só nos voluntários, à partida não estará senão não seriam voluntários, mas não está só na parte institucional ... devia governar estas coisas de uma forma melhor, mas acho que a própria sociedade, as próprias crianças deviam ser incutidas desde pequeninas a, no sentido de as responsabilizar também para ver o doente mental como uma pessoa perfeitamente, normal."</i> (Porto Volunteers Focus Group 2, Participant 6) |
| <i>"Aller dans des structures classiques se font souvent rejeter parce que elles ont cette étiquette-là et c'est le même problème avec les problèmes de santé mentale."</i> (Brussels Mental Health Professionals Focus Group 1, Participant 1, Psychologist)                                                                                                                                                                                                                                                                                                                                                                                                                                                                                                                                                                                                                                                                                                                                               |
| <b>4.2. Odd or artificial idea to provide friends to people/ Being a novelty/ Bad image of volunteering</b>                                                                                                                                                                                                                                                                                                                                                                                                                                                                                                                                                                                                                                                                                                                                                                                                                                                                                                 |
| <i>"It was a slightly odd idea, to kind of like artificially create, or provide friends to people; that's not how it works; and either you advise someone to go to speak to someone or meet with someone; you don't create friends to people. So I think the befriend...the word to me is slightly misleading."</i> (London Mental Health Professionals Focus Group 4, Participant 14, Psychiatrist)                                                                                                                                                                                                                                                                                                                                                                                                                                                                                                                                                                                                        |
| <i>"Um desafio que me vai pôr a pensar nos próximos dias de como é que elas se podem contactar, ou o que é que se pode inventar, se podemos sugerir ir a algum ponto e terem lá, quem não tem telemóvel, termos lá chamadas pagas para eles nos ligarem, não sei, é um desafio sem dúvida as novas tecnologias."</i> (Porto Volunteers Focus Group 2, Participant 1)                                                                                                                                                                                                                                                                                                                                                                                                                                                                                                                                                                                                                                        |
| <i>"Malheureusement le bénévolat n'a pas une très bonne image."</i> (Brussels Volunteers Focus Group 1, Participant 1)                                                                                                                                                                                                                                                                                                                                                                                                                                                                                                                                                                                                                                                                                                                                                                                                                                                                                      |
| <b>4.3. Bureaucracy and time to get a DBS check/ Lack of resources/ Lack of recognition</b>                                                                                                                                                                                                                                                                                                                                                                                                                                                                                                                                                                                                                                                                                                                                                                                                                                                                                                                 |
| <i>"DBS aren't always this slow, but they can be stupendously slow. And also for some people who don't have the right information that DBS check can be a problem."</i> (London Mental Health Professionals Focus Group 2, Participant 6, Social Worker)                                                                                                                                                                                                                                                                                                                                                                                                                                                                                                                                                                                                                                                                                                                                                    |
| <i>"Ou a pessoa está no lugar errado, ou então vai ter que passar por uma formação quase a zero, acho que este que é o principal desafio, até do Estado português e não sei quê, fazer uma reciclagem a todas as pessoas que estão neste frente de linha."</i> (Porto Volunteers Focus Group 2, Participant 1)                                                                                                                                                                                                                                                                                                                                                                                                                                                                                                                                                                                                                                                                                              |
| <i>"Pour moi les bénévoles, ils ont effectivement besoin de reconnaissance. En Belgique c'est peu, c'est peu reconnu, ou peu valorisé, et par contre un défi pour moi important qu'un bénévole doit relever c'est avoir gardé une juste distance peut-être."</i> (Brussels Mental Health Professionals Focus Group 1, Participant 1, Psychologist)                                                                                                                                                                                                                                                                                                                                                                                                                                                                                                                                                                                                                                                          |
| <b>4.4. Problem with distances and transports/ Long distances/ Complexity of dealing with the different languages in the country</b>                                                                                                                                                                                                                                                                                                                                                                                                                                                                                                                                                                                                                                                                                                                                                                                                                                                                        |
| <i>"Distance and transport in general. And actually the London problem I guess."</i> (London Mental Health Professionals Focus Group 4, Participant 14, Psychiatrist)                                                                                                                                                                                                                                                                                                                                                                                                                                                                                                                                                                                                                                                                                                                                                                                                                                       |
| <i>"E é de longe."</i> (Porto Mental Health Professionals Focus Group 3, Participant 11, Social Worker)                                                                                                                                                                                                                                                                                                                                                                                                                                                                                                                                                                                                                                                                                                                                                                                                                                                                                                     |
| <i>"La langue. C'est en tout cas a Bruxelles un des défis majeur c'est la fragmentation liée justement a tout ce qui, les différences compétences, donc au niveau des politiques, en voilà parce qu'on a différentes régions, différente communes etc., donc c'est toujours beaucoup compliqué d'être des acteurs dans le territoire autour d'une table, pour décider de mettre en place quelque chose, parce que voilà il y en a beaucoup des acteurs et dépendent de différents pouvoir. C'est compliqué."</i> (Brussels Mental Health Professionals Focus Group 1, Participant 3, Social Worker)                                                                                                                                                                                                                                                                                                                                                                                                         |
| <b>4.5. Difficult to deal with differences of culture, religion, and language/ Dealing with behaviour of patients/ Dealing with someone with psychosis</b>                                                                                                                                                                                                                                                                                                                                                                                                                                                                                                                                                                                                                                                                                                                                                                                                                                                  |
| <i>"It's difficult to kind of befriend someone who holds a different view about culture and religion and faith; you know they might not engage with that person in the way they would engage with someone of the same culture, belief and religion – you know? This is East London, language barrier is a big issue as well."</i> (London Mental Health Professionals Focus Group 2, Participant 5, Nurse)                                                                                                                                                                                                                                                                                                                                                                                                                                                                                                                                                                                                  |
| <i>"Acredito que alguns aspetos da doença de alguns doentes mentais graves, também vão impossibilitar ou, pelo menos, dificultar esta relação."</i> (Porto Mental Health Professionals Focus Group 4, Participant 15, Psychiatrist in training)                                                                                                                                                                                                                                                                                                                                                                                                                                                                                                                                                                                                                                                                                                                                                             |
| <i>"C'est quelque chose d'un peu particulier la psychiatrie parce qu'il y a des gestions de crises compliquées etc etc."</i> (Brussels Volunteers Focus Group 2, Participant 8)                                                                                                                                                                                                                                                                                                                                                                                                                                                                                                                                                                                                                                                                                                                                                                                                                             |
| <b>4.6. Selecting untrustworthy volunteers/ Involving others besides the volunteers/ Volunteers do their own volunteering</b>                                                                                                                                                                                                                                                                                                                                                                                                                                                                                                                                                                                                                                                                                                                                                                                                                                                                               |
| <i>"To be honest the challenges will be to get the right people to do that volunteering because it is this ... the society which we have, we've got some dodgy characters and we don't know if they go down ...the volunteers ...very intimidating to that person, going to the person's house. People have got devious needs to like get money from the older people isn't it.... So I think to get the right people that's gonna be the challenge in a way. Challenge to get the right trustworthy people."</i> (London Mental Health Professionals Focus Group 2, Participant 8, Nurse)                                                                                                                                                                                                                                                                                                                                                                                                                  |

|                                                                                                                                                                                                                                                                                                                                                                                                                                                                                                                                                                                                                                                                                                                                                                                                                                                                                                                                                                                                                                                         |
|---------------------------------------------------------------------------------------------------------------------------------------------------------------------------------------------------------------------------------------------------------------------------------------------------------------------------------------------------------------------------------------------------------------------------------------------------------------------------------------------------------------------------------------------------------------------------------------------------------------------------------------------------------------------------------------------------------------------------------------------------------------------------------------------------------------------------------------------------------------------------------------------------------------------------------------------------------------------------------------------------------------------------------------------------------|
| <p><i>"Imaginemos que o voluntário... com muito boa vontade introduz outra pessoa, um amigo dele próprio nesta relação de voluntário doente. Preocupa-me mais esta... introdução, porque não existe nenhum controlo. Nós estamos a falar muito da seleção do voluntário, mas ... Isto é uma coisa que não temos controlo e, de facto, parece-me um perigo muito maior introduzir uma terceira relação que não tem relação com o projeto do que, propriamente, a relação de onde é que se vão encontrar. A pessoa que tu já escolheste como voluntário e o doente. Parece-me mais... importante. Porque, por exemplo, imaginemos que o doente ia ter a casa do voluntário. Na casa do voluntário existe a família do voluntário, que não se sabe se será um ambiente propício ou, sequer, se terão abertura para estar com aquele doente. Preocupa-me mais isto, a interação com terceiros do que, propriamente, o local onde estes dois interagem."</i> (Porto Mental Health Professionals Focus Group 4, Participant 15, Psychiatrist in training)</p> |
| <p><i>"Ils savent qu'il y a une structure hospitalière, ou là que la situation est plus évidente et on voit que les écoutants bénévoles sont beaucoup au-delà de la question de leur tentation à eux, d'être dans une relation à deux, de faire leur bénévolat à leur façons, à leur mode. Ça c'est une difficulté."</i> (Brussels Mental Health Professionals Focus Group 1, Participant 3, Social Worker)</p>                                                                                                                                                                                                                                                                                                                                                                                                                                                                                                                                                                                                                                         |
| <p><b>4.7. Burden for the volunteers/ Over-involvement of the volunteer and the patient/ Being heavy for the volunteer</b></p>                                                                                                                                                                                                                                                                                                                                                                                                                                                                                                                                                                                                                                                                                                                                                                                                                                                                                                                          |
| <p><i>"If someone's sort of saying... 'it's gonna have such a significant impact on my life, you're the only person in my life'... if that were someone who I knew in the street – if that was a friend I had made who is kind of putting those sorts of demands on me I might start to wish to withdraw from that relationship, because it's over-bearing and over-burdening. So I think that there's something about...when you're involved in a befriending project kind of those sorts of boundaries about...if you want to pull out or withdraw from the relationship as well."</i> (London Mental Health Professionals Focus Group 1, Participant 2, Nurse)</p>                                                                                                                                                                                                                                                                                                                                                                                   |
| <p><i>"Haveria algumas pessoas que, se calhar, iam estar vinte e quatro horas disponíveis e não sei até que ponto isso era saudável para o voluntário. Deixava de... Já nem era voluntariado, era um modo de vida..."</i> (Porto Mental Health Professionals Focus Group 3, Participant 12, Psychiatrist in training)</p>                                                                                                                                                                                                                                                                                                                                                                                                                                                                                                                                                                                                                                                                                                                               |
| <p><i>"Pour moi c'est à ce cadre et ce qui se passe là reste là. Parce que ce n'est plus possible. Je ne peux pas tout transporter tout le temps toutes ces relations avec moi, c'est trop lourd mais je pense qu'il faut ... reconnaître humblement que ce n'est pas possible d'être l'ami de tout le monde."</i> (Brussels Volunteers Focus Group 2, Participant 8)</p>                                                                                                                                                                                                                                                                                                                                                                                                                                                                                                                                                                                                                                                                               |
| <p><b>4.8. Risk of over-professionalising volunteers/ Do a professional job, but not paid/ Risk of being unpaid work</b></p>                                                                                                                                                                                                                                                                                                                                                                                                                                                                                                                                                                                                                                                                                                                                                                                                                                                                                                                            |
| <p><i>"To over-professionalise... not to become a professional because of course we don't want and we don't expect [that]."</i>(London Mental Health Professionals Focus Group 1, Participant 1, Psychiatrist)</p>                                                                                                                                                                                                                                                                                                                                                                                                                                                                                                                                                                                                                                                                                                                                                                                                                                      |
| <p><i>"Eu acho que é um risco, um risco em qualquer voluntariado e a partir do momento em que nós oferecemos uma resposta de forma voluntária, corremos o risco de deixar de haver a pressão sobre essa resposta, sendo uma proposta boa e útil, seja dado de uma forma não voluntária. É como aquela coisa de meter professores voluntários e depois os professores que são professores, e que não são contratados por isso. Não podemos perder a noção, daquilo que é importante oferecer aos doentes, e que não devia estar a ser feito em regime de... voluntariado..."</i> (Porto Mental Health Professionals Focus Group 1, Participant 2, Psychiatrist in training)</p>                                                                                                                                                                                                                                                                                                                                                                          |
| <p><i>"Et alors l'autre chose c'est quand même aussi travailler avec des bénévoles qui font le travail que nous faisons, c'est comment est-ce qu'on travail entre collègues alors. Mes collègues infirmiers, assistant sociaux, éducateurs, psychologues, psychiatres. Si l'activité devient bénévole, d'une certaine manière bah je supprime mon travail. Donc je soutiens l'idée que je suis dans une société qui dit que mon travail n'a pas de valeur puisqu'il doit être fait gratuitement."</i>(Brussels Mental Health Professionals Focus Group 2, Participant 9, Psychiatrist)</p>                                                                                                                                                                                                                                                                                                                                                                                                                                                              |
| <p><b>4.9. Providing a volunteer to a patient that is not interested/ Exposing patients to risky behaviours/ Volunteers not listening to the patients</b></p>                                                                                                                                                                                                                                                                                                                                                                                                                                                                                                                                                                                                                                                                                                                                                                                                                                                                                           |
| <p><i>"They have the peer support worker, have a befriender, you know you are sending people to these schemes, and ... not everyone wants to have a befriender, not everyone wants to have a peer support worker. The fact that there are schemes outside there, it's a kind of move towards that...a person has to agree to that; it's not because I feel you would benefit from that."</i> (London Mental Health Professionals Focus Group 3, Participant 10, Psychiatrist)</p>                                                                                                                                                                                                                                                                                                                                                                                                                                                                                                                                                                       |
| <p><i>"Tal como vejo muitas situações em que levar para um sítio de risco de consumo de drogas pode correr mal, tal como se sair à noite e ficasse a dormir montes de horas também pode correr mal."</i> (Porto Mental Health Professionals Focus Group 4, Participant 16, Psychiatrist in training)</p>                                                                                                                                                                                                                                                                                                                                                                                                                                                                                                                                                                                                                                                                                                                                                |
| <p><i>"Je crois que ça ne marche pas encore en fait on n'essaie pas d'être à l'écoute."</i> (Brussels Volunteers Focus Group 2, Participant 7)</p>                                                                                                                                                                                                                                                                                                                                                                                                                                                                                                                                                                                                                                                                                                                                                                                                                                                                                                      |
| <p><b>4.10. Volunteers that undermine clinicians' work/ Relationship is 'toxic' to the patient/ Manipulate the patient</b></p>                                                                                                                                                                                                                                                                                                                                                                                                                                                                                                                                                                                                                                                                                                                                                                                                                                                                                                                          |
| <p><i>"then somebody else, another volunteer who'd had her own experiences, negative experiences of ... NHS services and she was sort of intervening in an unhelpful way of "You shouldn't listen to what they are saying or you shouldn't be... so it felt unhelpful and getting in the way of relationships and questioning treatment... so it was undoing a lot of hard work that had been done and made the person feel unsettled and anxious and started questioning herself again. So that wasn't helpful."</i> (London Mental Health Professionals Focus Group 4, Participant 15, Social Worker)</p>                                                                                                                                                                                                                                                                                                                                                                                                                                             |
| <p><i>"Depois a questão de... ser amigo, e com... alguém que seja, que tenha uma perturbação mental ou uma psicopatologia, até que ponto poderão criar... quase que como que... processos psicoterapêuticos tóxicos ou... pseudo-psicoterapêuticos, exagerando na expressão, até que ponto isso poderá ser prejudicial... para o doente."</i> (Porto Mental Health Professionals Focus Group 1, Participant 3, Psychiatrist in training)</p>                                                                                                                                                                                                                                                                                                                                                                                                                                                                                                                                                                                                            |
| <p><i>"Manipuler c'est influencer mais avec une très mauvaise intention de faire mal quoi. Donc c'est retourner la personne et tout ça peu... aller comment on dit ça ...c'est un peu du chantage. Voilà un genre de chantage affectif, c'est très dur le chantage affectif et"</i></p>                                                                                                                                                                                                                                                                                                                                                                                                                                                                                                                                                                                                                                                                                                                                                                 |

*je dirais que quand la personne, en tout cas je sais que moi que quand je suis très souffrante de faire attention de ne pas rentrer dans ce chantage affectif.*"(Brussels Volunteers Focus Group 2, Participant 8)

#### **4.11. To end the relationship/ Become dependent on the volunteer/ Risk of breaking the relationship**

*"people who have suffered extreme loss, to then get cut short again and lose someone else and you become friends with someone that you lose then as well, it just...it feels almost like you could be really traumatised."* (London Volunteers Focus Group 1, Participant 2)

*"A mim não me faz impressão a amizade. Porque tem que ser uma coisa bilateral e estaria tudo bem. Faz-me impressão é depois, se calhar, o doente depois criar uma relação de dependência relativamente ao voluntário. E aí acho que deixa de ser benéfico, não é?"* (Porto Mental Health Professionals Focus Group 3, Participant 9, Psychiatrist in training)

*"on a envie d'avoir cette relation d'une personne à l'autre mais quelque part on est toujours coincé parce qu'il y a quand même des connaissances, des limites à donner, le danger de rupture."* (Brussels Mental Health Professionals Focus Group 2, Participant 8, Social worker)

| <b>Theme 5. Technology has potential in volunteering</b>                                                                                                                                                                                                                                                                                                                                                                                                                                                                                                                                                                                |
|-----------------------------------------------------------------------------------------------------------------------------------------------------------------------------------------------------------------------------------------------------------------------------------------------------------------------------------------------------------------------------------------------------------------------------------------------------------------------------------------------------------------------------------------------------------------------------------------------------------------------------------------|
| <b>5.1. Enables human contact / Tool for patients to acquire skills/ Brings people together</b>                                                                                                                                                                                                                                                                                                                                                                                                                                                                                                                                         |
| <i>"The befriender would call an elderly person at his certain time every day or every other day – just to kind of check in "how are you doing, how's your day been?" because that person is so lonely. And the value that that person had to having that human contact everyday." (London Mental Health Professionals Focus Group 1, Participant 2, Nurse)</i>                                                                                                                                                                                                                                                                         |
| <i>"Um paciente, até porque não consegue fazer aquilo mas com aquela estimulação vai desenvolver outras competências, nesse aspeto até concordo que sim, que a tecnologia é realmente um meio de apoio e que deve ser usado sempre dessa forma, sempre com o controle."(Porto Volunteers Focus Group 2, Participant 4)</i>                                                                                                                                                                                                                                                                                                              |
| <i>"Je crois que même en dehors de tout élément technologique, à partir du moment qu'il y a quelqu'un qui adresse quelque chose à quelqu'un d'autres, qui répond d'une quelconque manière, on est directement dans la rencontre dans le lien, et on ne sait plus s'épargner ça. Ce que tu ne sais plus en plus revenir en arrière puisque ont marqué quelque part, l'appelant et le répondent. Donc voilà je pense que la technologie, oui mais on s'est pas s'empêché d'être en lien non plus avec l'autre. Et c'est ça qui est thérapeutique." (Brussels Mental Health Professionals Focus Group 3, Participant 11, Psychologist)</i> |
| <b>5.2. Is an add on to the relationship/ It complements the physical relationship/ Complementary to the face-to-face relationship</b>                                                                                                                                                                                                                                                                                                                                                                                                                                                                                                  |
| <i>"The befriender would call and elderly person at his certain time every day or every other day – just to kind of check in "how are you doing, how's your day been?" because that person is so lonely. And the value that that person had to having that human contact everyday. And he talked about it being a 'life-line' and then they had a...kind of then they met, sort of like every fortnight, she would visit him every fortnight." (London Mental Health Professionals Focus Group 1, Participant 2, Nurse)</i>                                                                                                             |
| <i>"Acho que as relações têm que ser humanas acima de tudo, interação sempre, presencial, pessoal..." (Porto Volunteers Focus Group 2, Participant 5)</i>                                                                                                                                                                                                                                                                                                                                                                                                                                                                               |
| <i>"Moi je trouve que cette question-là, pour moi, j'en vois une autre, c'est que d'une part, c'est que pour moi, je n'ai pas de problème, c'est oui à la technologie, pour peu que ne fasse pas faire l'économie de la rencontre." (Brussels Mental Health Professionals Focus Group 1, Participant 3, Social Worker)</i>                                                                                                                                                                                                                                                                                                              |
| <b>5.3. Links people in different cities/ Connects people/ Overcomes distances</b>                                                                                                                                                                                                                                                                                                                                                                                                                                                                                                                                                      |
| <i>"If you used the online tool then you could have a volunteer in Manchester and another in Brighton. And so it widens it and so if you want to make it like really flexible and easy." (London Mental Health Professionals Focus Group 4, Participant 14, Psychiatrist)</i>                                                                                                                                                                                                                                                                                                                                                           |
| <i>"Há pessoas que vivem isoladas, por exemplo, nas aldeias e assim, dias e dias sem ver outra pessoa, portanto, sentem-se isoladas e ... se for por informática, telefone e assim...vêm a pessoa. É totalmente diferente, eu acho." (Porto Volunteers Focus Group 2, Participant 3)</i>                                                                                                                                                                                                                                                                                                                                                |
| <i>"Mais vraiment mise au service de l'humain ça permet, comme avec Skype d'ailleurs je travaille sur toute la planète avec Skype, ça permet, mais c'est dingue quoi, ça coupe les distances." (Brussels Volunteers Focus Group 2, Participant 6)</i>                                                                                                                                                                                                                                                                                                                                                                                   |
| <b>5.4. A few contacts per week/ Fewer contacts required/ A brief telephone contact may suffice</b>                                                                                                                                                                                                                                                                                                                                                                                                                                                                                                                                     |
| <i>"People who are really isolated and don't even want face-to-face, it could be saying 'well you know ... maybe you can just exchange a few text messages per week and if that's something you think would be helpful to you and you'd be keen to receive why not', or email exchanges." (London Mental Health Professionals Focus Group 4, Participant 13, Psychiatrist)</i>                                                                                                                                                                                                                                                          |
| <i>"Tu não necessitas de estar a contactar diariamente com o voluntário para ter uma relação de amizade com ele." (Porto Mental Health Professionals Focus Group 4, Participant 15, Psychiatrist in training)</i>                                                                                                                                                                                                                                                                                                                                                                                                                       |
| <i>"Mais ce qu'on voit ce que il y en a des gens qui sont vraiment dans du débordement, des gens qui appellent complètement flippé ou qui débordent qui flambent pour dire qu'a un certain moment ça flambe. Parfois trois minutes c'est complètement suffisant." (Brussels Mental Health Professionals Focus Group 1, Participant 3, Social Worker)</i>                                                                                                                                                                                                                                                                                |
| <b>5.5. Gives more control in what you want to share/ Enables one to monitor the communication/ Takes away the spontaneity</b>                                                                                                                                                                                                                                                                                                                                                                                                                                                                                                          |
| <i>"People don't sort of know who you are so you can ask questions that you might feel uncomfortable asking otherwise and getting opinions of lots of different people back." (London Mental Health Professionals Focus Group 4, Participant 13, Psychiatrist)</i>                                                                                                                                                                                                                                                                                                                                                                      |
| <i>"Suponho que teria de ser... Haveria uma equipa, não é? Que vai coordenando. Por exemplo, o voluntariado ter acesso a tudo, se calhar, não. O doente até pode estar sempre mal, dar pontos negativos àquelas atividades..." (Porto Mental Health Professionals Focus Group 3, Participant 9, Psychiatrist in training)</i>                                                                                                                                                                                                                                                                                                           |
| <i>"Alors on voit même les sites de rencontre mais finalement on se rencontre sur base de critère : 'Je recherche une femme avec des yeux bleus qui a entre 35 et 45 ans.' Personnellement moi je trouve dans la rencontre, la technologie peut amener plus de négatif dans la perte de la spontanéité et de la richesse plutôt que du positif. " (Brussels Mental Health Professionals Focus Group 3, Participant 13, Psychiatrist in training)</i>                                                                                                                                                                                    |
| <b>5.6. Good for patients that have face-to-face anxiety/ Encourages the patient through sharing information/ Good for those who have anxiety in the face-to-face</b>                                                                                                                                                                                                                                                                                                                                                                                                                                                                   |
| <i>"To plant the seed, sort of like of the social contact and maybe having technology is less frightening than having like you know space... Like online dating; so maybe people communicate and you know, emails, and then eventually in the sixth month, maybe if the patient... is familiar with the face of the volunteer maybe finally the patient will agree to sort of meet in person and go out for a</i>                                                                                                                                                                                                                       |

|                                                                                                                                                                                                                                                                                                                                                                                                                                                                                                                                                                                                                                         |
|-----------------------------------------------------------------------------------------------------------------------------------------------------------------------------------------------------------------------------------------------------------------------------------------------------------------------------------------------------------------------------------------------------------------------------------------------------------------------------------------------------------------------------------------------------------------------------------------------------------------------------------------|
| <p><i>cup of coffee or tea or whatever. So in my mind then maybe that can initially reduce the anxiety but the ultimate aim might be to meet in person.</i>" (London Mental Health Professionals Focus Group 3, Participant 10, Psychiatrist)</p>                                                                                                                                                                                                                                                                                                                                                                                       |
| <p><i>"O voluntário todos os dias mandar uma música que gostasse... uma música ou um link giro..."</i> (Porto Mental Health Professionals Focus Group 1, Participant 4, Psychiatrist in training)</p>                                                                                                                                                                                                                                                                                                                                                                                                                                   |
| <p><i>"Donc il y a quelque chose qui... le téléphone... peut être positif, et à la fois ça peut être négatif. Parce que, négatif dans le sens qu'il n'y a pas toute l'expérimentation du lien à l'autre en fait. Il n'y a pas toutes les facettes du lien, donc à avoir avec quelqu'un. Par contre ça encourage certaines personnes qui peut être ne prendrait jamais rendez-vous avec un psy. Dont le face à face est très angoissant."</i> (Brussels Mental Health Professionals Focus Group 3, Participant 11, Psychologist)</p>                                                                                                     |
| <p><b>5.7. Different types of communication may have an increasing human contact/ Face-to-face communication is preferable/ Each person occupies a different role on the phone</b></p>                                                                                                                                                                                                                                                                                                                                                                                                                                                  |
| <p><i>"It's like four levels isn't it? You have the written communication with text or email; then you have the phone conversation [over] audio; then you have the face video-conference; and then you have the face-to-face meeting, isn't it? So ... you add on more information and exchange of communication when you move up from level one to level four."</i> (London Mental Health Professionals Focus Group 3, Participant 11, Psychiatrist)</p>                                                                                                                                                                               |
| <p><i>"Mas, sinceramente, eu acho que isso é importante, mas como uma coisa à parte para situações mais agudas, porque apesar de tudo, o mais importante é ter interação humana, frente a frente com a pessoa. Nós estamos a perder muitas capacidades e até capacidades sociais com muitas pessoas por não interagir frente a frente com as pessoas. Acho que perdemos um bocado se formos só por aí..."</i> (Porto Mental Health Professionals Focus Group 3, Participant 10, Psychiatrist in training)</p>                                                                                                                           |
| <p><i>"Mais, il y a à tenir qu'on n'occupe pas les mêmes places dans cette rencontre. L'un est écoutant, et l'autre appelant. Et ce n'est pas une question que l'un est plus que l'autre, plus malade ou moins malade et tout ça. Mais on n'occupe pas les mêmes places, et ça c'est à maintenir cette affaire."</i> (Brussels Mental Health Professionals Focus Group 1, Participant 3, Social Worker)</p>                                                                                                                                                                                                                             |
| <p><b>5.8. Takes away human interaction/ Risk of replacing the physical relationship/ Unnecessary for the relationship</b></p>                                                                                                                                                                                                                                                                                                                                                                                                                                                                                                          |
| <p><i>"The volunteering aspect is coming in to bring the human touch, if you like, and if we bring in too many technology, it takes away that human face interaction and discussion. So it's useful to have ... text messages to remind appointments etcetera, but then if we take...if we move from that basic use of technology to more emails, then it becomes like in the office sometimes instead of talking to your colleague you send him an email."</i> (London Mental Health Professionals Focus Group 2, Participant 7, Nurse)</p>                                                                                            |
| <p><i>"Mas, sinceramente, eu acho que isso é importante, mas como uma coisa à parte para situações mais agudas, porque apesar de tudo, o mais importante é ter interação humana, frente a frente com a pessoa. Nós estamos a perder muitas capacidades e até capacidades sociais com muitas pessoas por não interagir frente a frente com as pessoas. Acho que perdemos um bocado se formos só por aí..."</i> (Porto Mental Health Professionals Focus Group 3, Participant 10, Psychiatrist in training)</p>                                                                                                                           |
| <p><i>"Mais ça cela peu peut être balayé, c'est un peu le fait que le bénévole en santé mentale est d'abord là pour créer, entretenir une relation humaine, une relation qui peut durer dans le temps mais qui est surtout dans le moment présent. Et donc on n'a pas besoin de ces technologies."</i>(Brussels Mental Health Professionals Focus Group 4, Participant 19, Nurse)</p>                                                                                                                                                                                                                                                   |
| <p><b>5.9. Put at risk what is essential, the relationship/ Risk of having an 'app' only for patients and volunteers/ Not being transparent with the institution</b></p>                                                                                                                                                                                                                                                                                                                                                                                                                                                                |
| <p><i>"If you are using advanced technology, we may forget about the befriending scheme – because that is not what the purpose is."</i> (London Mental Health Professionals Focus Group 2, Participant 5, Nurse)</p>                                                                                                                                                                                                                                                                                                                                                                                                                    |
| <p><i>"Tenho algum receio, de estar a arranjar caminhos próprios, para aqui... quando, se calhar o interesse, seria ensinar o doente a usar os caminhos comuns, e perpetuar um bocado a ideia de... eu sou voluntário e ele é um doente, e a nossa relação, é diferente das outras, e nós até temos uma aplicação diferente das outras para falar, percebo as vantagens, mas se calhar preferia que os doentes, usassem as vias que as outras pessoas... porque isto perpetua a ideia de que eu sou doente e os outros são normais."</i> (Porto Mental Health Professionals Focus Group 1, Participant 2, Psychiatrist in training)</p> |
| <p><i>"Donc si c'est quelqu'un qui travaille entre guillemets qui fait du bénévole chez nous et qui entretient une relation, je ne sais pas moi, Facebook, SMS ou autre avec le patient donc c'est de...la non-transparence avec l'institution qui fait confiance pour quelque chose. Qu'est-ce-que cela va provoquer dans la remise en question..."</i> (Brussels Mental Health Professionals Focus Group 4, Participant 19, Nurse)</p>                                                                                                                                                                                                |
| <p><b>5.10. Patients becoming paranoid / More difficult to establish boundaries / Technology can be invasive</b></p>                                                                                                                                                                                                                                                                                                                                                                                                                                                                                                                    |
| <p><i>"I think the knowledge of being monitored isn't also going to suit the kind of people that you're planning to work with either, because if you're telling people who might have paranoia that they are gonna be monitored, you're gonna affect that relationship and it's going to affect how people communicate with each other or how often, and I don't think that's a good idea, to monitor that."</i> (London Mental Health Professionals Focus Group 3, Participant 12, Psychologist)</p>                                                                                                                                   |
| <p><i>"Não me vai ligar agora às duas da manhã porque não consegue dormir, não é? Isso não tem sentido nenhum."</i> (Porto Mental Health Professionals Focus Group 3, Participant 9)</p>                                                                                                                                                                                                                                                                                                                                                                                                                                                |
| <p><i>"À un moment cela peut effectivement avoir un effet de renforcement au niveau de la relation, mais cela peut être très empoisonnant à d'autres moments et envahissant."</i> (Brussels Mental Health Professionals Focus Group 4, Participant 19, Nurse)</p>                                                                                                                                                                                                                                                                                                                                                                       |

| <b>Theme 6. Volunteering impacts us all</b>                                                                                                                                                                                                                                                                                                                                                                                                                                                                                                            |
|--------------------------------------------------------------------------------------------------------------------------------------------------------------------------------------------------------------------------------------------------------------------------------------------------------------------------------------------------------------------------------------------------------------------------------------------------------------------------------------------------------------------------------------------------------|
| <b>6.1. Promote patients' recovery/ Patient always benefits even if they do not notice/ Therapeutic effect for patients</b>                                                                                                                                                                                                                                                                                                                                                                                                                            |
| <i>"Do other activities that would promote their recovery – so I think it's a very good and important scheme to have."</i> (London Mental Health Professionals Focus Group 2, Participant 5, Nurse)                                                                                                                                                                                                                                                                                                                                                    |
| <i>"E a pessoa que está a ser ajudada, se estivermos a fazer, se estivermos a ajudar vai, pode sentir ou pode não sentir, mas vai acabar por ser ajudada, eu acho que independentemente dele saber disso ou ter ou não consciência, acho que tem sempre benefícios."</i> (Porto Volunteers Focus Group 1, Participant 1)                                                                                                                                                                                                                               |
| <i>"Pour moi les bénévoles en tout cas c'est que j'encadre, je connais n'ont absolument pas d'objectif thérapeutique, alors qu'un professionnel a un objectif thérapeutique mais je pense néanmoins qu'il y a un effet thérapeutique qui est d'escomptée de celui-là. Donc je pense que la différence entre l'effet thérapeutique et l'objectif thérapeutique est essentiel mais tenu."</i> (Brussels Mental Health Professionals Focus Group 1, Participant 3, Social Worker)                                                                         |
| <b>6.2. Reduce patients' social isolation/ Social integration of patients/ Realise that they are more than a disease</b>                                                                                                                                                                                                                                                                                                                                                                                                                               |
| <i>"The benefits are quite crucial I think, for me ... Improving quality of life in terms of socialisation and getting involved in activities – or even if it just means being able to go out in the community and have fresh air, because there are some clients with mental illness that to go out alone, they are quite frightened to go out and worried that something might happen to them – you know, just to get out and get fresh air is, is advantage for them."</i> (London Mental Health Professionals Focus Group 2, Participant 5, Nurse) |
| <i>"Há imensos tipos de doenças, da falta de saúde mental, mas que se calhar algumas delas o que precisam é que alguém as ajude a ter uma vida em sociedade, e se calhar vão precisar que alguém vá conversar com elas umas horas e a faça sentir que tem uma amiga, uma irmã, um irmão, um primo."</i> (Porto Volunteers Focus Group 2, Participant 5)                                                                                                                                                                                                |
| <i>"Quand ils se rendent compte aussi qu'ils ne sont pas qu'une maladie. Ils sont toutes autre chose à côté. Il y a un champ de communication qui entre quelqu'un qui n'effectivement qui n'a pas un problème de santé mentale. Mais ils se rendent compte, ils se rendent compte que autre part que la maladie."</i> (Brussels Mental Health Focus Group 2, Participant 5, Social worker)                                                                                                                                                             |
| <b>6.3. Make volunteers feel useful/ Volunteers satisfied helping others/ Make volunteers feel useful</b>                                                                                                                                                                                                                                                                                                                                                                                                                                              |
| <i>"It was a very rewarding experience because I felt very useful for someone. And then I met lovely people."</i> (London Mental Health Professionals Focus Group 1, Participant 1, Psychiatrist)                                                                                                                                                                                                                                                                                                                                                      |
| <i>"Um voluntário, eu acho que...quem tenha experiência, não só na saúde mental em qualquer outro contato, ganhamos, ganha mais a pessoa que dá... porque dar, é muito mais gratificante, do que receber..."</i> (Porto Mental Health Professionals Focus Group 1, Participant 4, Psychiatrist in training)                                                                                                                                                                                                                                            |
| <i>"Mais sur le fait que le patient va sans doute aussi amener certains éléments qui seront utiles aux bénévoles, mais c'est au cas par cas."</i> (Brussels Mental Health Professionals Focus Group 1, Participant 1, Psychologist)                                                                                                                                                                                                                                                                                                                    |
| <b>6.4. Increase volunteers' knowledge about mental health/ Occupy the volunteers and gain experience / Volunteers gain professional experience</b>                                                                                                                                                                                                                                                                                                                                                                                                    |
| <i>"I find on the mental health side, I'm no longer scared of mental health... I've got a greater understanding, a greater empathy for somebody that suffers mental ill-health."</i> (London Volunteers Focus Group 2, Participant 5)                                                                                                                                                                                                                                                                                                                  |
| <i>"As pessoas que de facto, levam isto a sério, e os verdadeiros voluntários que levam isto a sério, são pessoas que se não estivessem a fazer, podiam estar desempregadas, podiam estar na violência... podiam cometer determinados crimes."</i> (Porto Mental Health Professionals Focus Group 1, Participant 1, Psychiatrist in training)                                                                                                                                                                                                          |
| <i>"Mais ce qui paye le bénévole, c'est que l'autre lui donne de la compétence, parce qu'il a besoin de le rencontrer pour être compétent et donc il se forme."</i> (Brussels Mental Health Professionals Focus Group 2, Participant 9, Psychiatrist)                                                                                                                                                                                                                                                                                                  |
| <b>6.5. Levelling for the volunteers/ Volunteers contact with a different reality/ Volunteers learn from the patients</b>                                                                                                                                                                                                                                                                                                                                                                                                                              |
| <i>"It would be useful for a lot of people to come and do a few hours ...on a ward, you know play chess with the service users, spend some time, have a chat, read the paper. It's very levelling I think."</i> (London Mental Health Professionals Focus Group 2, Participant 6, Social Worker)                                                                                                                                                                                                                                                       |
| <i>"Em termos de experiências para o voluntário acho que pode ser muito bom, porque às vezes como são populações um bocadinho... excluídas... aonde não chegam se calhar propriamente e tomamos contato com uma realidade muito diferente, ou seja para os voluntários estão a tomar contacto, com uma realidade, que desconhecem esse aspeto, são tão novas experiências para os doentes, mas também são novas experiências para os voluntários."</i> (Porto Mental Health Professionals Focus Group 1, Participant 1, Psychiatrist in training)      |
| <i>"Après moi ça ne m'a jamais empêché d'être dans une bonne relation avec ces gens de pas connaître ces cases psychiatriques. Même d'une certaine manière, j'ai appris à connaître ces cases psychiatriques en posant des questions directement aux gens, et je ne les aies pas apprises théoriquement."</i> (Brussels Volunteers Focus Group 1, Participant 3)                                                                                                                                                                                       |
| <b>6.6. Can increase or decrease the mental health professionals' workload/ Reduce the workload of mental health professionals/ Reduce workload of mental health professionals</b>                                                                                                                                                                                                                                                                                                                                                                     |
| <i>"It has the potential to both make your work-load bigger and also make your work-load smaller, depending on how it goes really."</i> (London Mental Health Professionals Focus Group 4, Participant 15, Social Worker)                                                                                                                                                                                                                                                                                                                              |

|                                                                                                                                                                                                                                                                                                                                                                                                                                                                                                                                      |
|--------------------------------------------------------------------------------------------------------------------------------------------------------------------------------------------------------------------------------------------------------------------------------------------------------------------------------------------------------------------------------------------------------------------------------------------------------------------------------------------------------------------------------------|
| <p><i>"Como nós falamos há bocado, na questão de haver ou não diferença para o psiquiatra, eu acho que deve haver e que de certa forma tem de haver, um menor trabalho dos técnicos que estão envolvidos no cuidar do doente ..."</i> (Porto Mental Health Professionals Focus Group 1, Participant 2, Psychiatrist in training)</p>                                                                                                                                                                                                 |
| <p><i>"Je peux imaginer c'est que si vous donnez aux bénévoles un travail que vous auriez du faire où vous aurez moins de travail si vous engagez un bénévole pour faire un travail qui va se rajouter à quelque chose qui manquait donc vous n'aurez pas plus de travail."</i> (Brussels Mental Health Professionals Focus Group 2, Participant 5, Social Worker)</p>                                                                                                                                                               |
| <p><b>6.7. Can be a way of different people working together/ Release tension in relationships with family members/ Support an inclusive society</b></p>                                                                                                                                                                                                                                                                                                                                                                             |
| <p><i>"People don't sort of know who you are so you can ask questions that you might feel uncomfortable asking otherwise and getting opinions of lots of different people back."</i> (London Mental Health Professionals Focus Group 4, Participant 13, Psychiatrist)</p>                                                                                                                                                                                                                                                            |
| <p><i>"Está em casa... e de resto não faz mais nada. Só contacta com a mãe, depois claro que a mãe, quando não lhe dá o dinheiro, ele fica um bocadinho... agressivo... e acho que este doente precisa de muito apoio... uma coisa social... sair de casa, estar com outras pessoas. Também para libertar um pouco a mãe e diminuir a tensão desta relação."</i> (Porto Mental Health Professionals Focus Group 3, Participant 9, Psychiatrist in training)</p>                                                                      |
| <p><i>"Pour moi le bénévolat c'est aussi un besoin personnel de contribuer utilement de trouver une place dans la société de transmettre un savoir qu'on a et qu'on peut, peut être plus transmettre professionnellement c'est vraiment pour exercer le fait du rôle utile dans la société, qui soit ponctuelle on qui fait parti d'un programme."</i> (Brussels Volunteers Focus Group 2, Participant 7)</p>                                                                                                                        |
| <p><b>6.8. Reduce stigma/ Break the stigma in society/ Reduce stigma</b></p>                                                                                                                                                                                                                                                                                                                                                                                                                                                         |
| <p><i>"I think with the volunteer there's this less stigma attached and they feel less judged by someone who they could probably just be friends with. So I think maybe that's how it might help."</i> (London Mental Health Professionals Focus Group 3, Participant 12, Psychologist)</p>                                                                                                                                                                                                                                          |
| <p><i>"Porque, porque os doentes mentais são vistos como, há pouco estava a dizer ... como se fossem quase uns bichos, animais, não é nada disso, são pessoas como nós, portanto, eu acho que é um bocadinho quebrar, quebrar esse mito. Ajudá-los, levá-los à rua, passear."</i> (Porto Volunteers Focus Group 1, Participant 2)</p>                                                                                                                                                                                                |
| <p><i>"Reste toujours quelque chose qui est étrange pour beaucoup de gens, et qui est inaccessible quand on a a faire avec une personne en maladie mentale grave, il y a une distance qui se crée, et l'ouverture de la parole est très difficile. Je crois que c'est très important d'avoir ces volontariats mais d'amener les gens dans la société pour normalisée ou en tout cas plus étiqueté, d'une façon...qui réduit la personne."</i> (Brussels Mental Health Professionals Focus Group 2, Participant 8, Social Worker)</p> |
